# Supplementary material for: Validation of protein models by a neural network approach
Source: PubMed Central journal article supplement (PMC2276493; doi:10.1186/1471-2105-9-66), 2008-01-29
Supplement: 1471-2105-9-66-S1.pdf [file 1471-2105-9-66-S1.pdf]

Linear models obtained with linear regression and M5-prime attribute selection algorithm.

For each accuracy measure the models weights, the excluded parameters and the prediction performance are shown. The training-set and the test-set used for obtaining and evaluating the linear model are the same used for the neural network.

#### Parameters abbreviations

---

|            |                                                                       |
|------------|-----------------------------------------------------------------------|
| SS         | Fraction of secondary structure                                       |
| CORE       | Percentage of residue in Ramachandran plot CORE                       |
| ALL        | Percentage of residue in Ramachandran plot allowed regions            |
| GENALL     | Percentage of residue in Ramachandran plot generously allowed regions |
| DISALL     | Percentage of residue in Ramachandran plot disallowed regions         |
| nBC        | Number of bad contacts                                                |
| $DH_G$     | G-factor for dihedral angles                                          |
| $COV_B$    | G-factor for covalent bonds                                           |
| $OVER_G$   | Overall G-factor                                                      |
| $HB_{SAS}$ | hydrophobic relative solvent accessible surface                       |
| $HY_{SAS}$ | hydrophilic relative solvent accessible surface                       |
| SSc        | Secondary structure consensus                                         |
| rQ         | Relative number of hydrophobic contacts                               |
| L          | Number of residues                                                    |

---

## 1 RMSD

$$1.9305SS - 0.2326DH_G - 0.351COV_G + 0.9225OVER_G - 0.1815CORE - 0.1591ALL - 0.1899GENALL - 0.1215DISALL - 4.1309HB_{SAS} - 12.1232HY_{SAS} - 0.0362SSc - 0.0382rQ - 0.0022L + 30.4336$$

Excluded parameters : nBC

Pearson correlation coefficient : 0.30

## 2 GDT\_TS

$$-0.3586SS - 0.0006nBC - 0.0434DG_G - 0.036COV_G + 0.0463OVER_G - 0.0018ALL + 0.0041DISALL - 1.5662HB_{SAS} + 0.0025SSc - 0.0088rQ - 0.0001L + 1.2403$$

Excluded parameters : CORE, GENALL,  $HY_{SAS}$

Pearson correlation coefficient : 0.32

## 3 TM-score

$$-0.3937SS - 0.0006BC - 0.0369DG_G - 0.0168COV_G - 0.002ALL + 0.0026DISALL - 1.6329HB_{SAS} + 0.0027SSc - 0.0163rQ + 0.0003L + 1.2718$$

Excluded parameters : CORE, GENALL,  $HY_{SAS}$ ,  $OVER_G$

Pearson correlation coefficient : 0.31

#### 4 MaxSub

$$-0.3639SS + -0.0006nBC + -0.025DG_G + -0.0239COV_G + 0.0188OVER_G + -0.0016ALL + 0.0029DISALL + -1.3149HB_{SAS} + 0.1461HY_{SAS} + 0.0024SSc + -0.005rQ + 0.9618$$

Excluded parameters : CORE, GENALL, L

Pearson correlation coefficient : 0.33

#### 5 LG-score

$$1.0516SS + 0.0473DG_G + 0.1107COV_G + -0.2139OVER_G + 0.0014ALL + -0.0161DISALL + -0.8566HB_{SAS} + -1.0837HY_{SAS} + -0.0015rQ + 0.0328SSc + -0.0008L + 1.2131$$

Excluded parameters : nBC, CORE, GENALL, GENALL, L

Pearson correlation coefficient : 0.28
